# Supplementary material
Source: PubMed Central journal article supplement (PMC4151472)
Supplement: NIHMS616295-supplement-01.pdf [file NIHMS616295-supplement-01.pdf]

**eTable 1A:** Characteristics of NESARC participants with threshold and sub-threshold mood syndromes at the wave 1 (baseline) interview in the study sample to assess *incident* alcohol dependence.

| Characteristics                                                           | Alcohol self-medication at baseline |      |         |      | Bivariate logistic regression analyses |           |        |
|---------------------------------------------------------------------------|-------------------------------------|------|---------|------|----------------------------------------|-----------|--------|
|                                                                           | Absent                              |      | Present |      | OR                                     | 95% CI    | p      |
|                                                                           | N                                   | %    | N       | %    |                                        |           |        |
| Sex                                                                       |                                     |      |         |      |                                        |           |        |
| Female                                                                    | 2,840                               | 67.6 | 127     | 54.9 | 1.00                                   |           |        |
| Male                                                                      | 1,173                               | 32.4 | 81      | 45.1 | 1.71                                   | 1.21-2.42 | 0.003  |
| Age (years)                                                               |                                     |      |         |      |                                        |           |        |
| 18-29                                                                     | 862                                 | 23.3 | 67      | 39.8 | 1.00                                   |           |        |
| 30-39                                                                     | 933                                 | 21.6 | 62      | 26.4 | 0.71                                   | 0.45-1.13 | 0.145  |
| 40-54                                                                     | 1,390                               | 35.0 | 56      | 24.8 | 0.41                                   | 0.25-0.67 | 0.001  |
| 55+                                                                       | 828                                 | 20.2 | 23      | 9.0  | 0.26                                   | 0.15-0.46 | <0.001 |
| Race/ethnicity                                                            |                                     |      |         |      |                                        |           |        |
| Non-Hispanic white                                                        | 2,727                               | 79.2 | 122     | 72.8 | 1.00                                   |           |        |
| Non-Hispanic black                                                        | 531                                 | 7.5  | 34      | 10.4 | 1.51                                   | 1.00-2.29 | 0.051  |
| Hispanic                                                                  | 615                                 | 8.6  | 44      | 12.0 | 1.51                                   | 0.96-2.38 | 0.074  |
| Other                                                                     | 140                                 | 4.6  | 8       | 4.8  | 1.11                                   | 0.47-2.63 | 0.806  |
| Education (years of schooling)                                            |                                     |      |         |      |                                        |           |        |
| <12                                                                       | 441                                 | 9.9  | 36      | 15.0 | 1.00                                   |           |        |
| 12 or GED                                                                 | 1,034                               | 25.6 | 53      | 29.4 | 0.76                                   | 0.43-1.34 | 0.337  |
| >12                                                                       | 2,538                               | 64.6 | 119     | 55.7 | 0.57                                   | 0.35-0.92 | 0.023  |
| Drinking pattern in the past year                                         |                                     |      |         |      |                                        |           |        |
| Less than every day                                                       | 3,734                               | 93.0 | 175     | 83.0 | 1.00                                   |           |        |
| Every day or nearly every day                                             | 279                                 | 7.0  | 33      | 17.0 | 2.73                                   | 1.72-4.32 | <0.001 |
| Amount of alcohol consumed on drinking days in the past year <sup>a</sup> |                                     |      |         |      |                                        |           |        |
| Less than 5 drinks                                                        | 3,783                               | 94.1 | 163     | 78.4 | 1.00                                   |           |        |
| 5 drinks or more                                                          | 224                                 | 5.9  | 43      | 21.6 | 4.40                                   | 2.94-6.60 | <0.001 |
| Affective diagnosis <sup>b</sup>                                          |                                     |      |         |      |                                        |           |        |
| Major depression                                                          | 1,222                               | 29.8 | 126     | 58.2 | 3.29                                   | 2.27-4.78 | <0.001 |
| Mania/hypomania                                                           | 425                                 | 10.5 | 45      | 19.6 | 2.08                                   | 1.38-3.14 | 0.001  |
| Dysthymia                                                                 | 320                                 | 7.6  | 23      | 9.9  | 1.33                                   | 0.70-2.49 | 0.375  |
| Comorbid conditions <sup>b</sup>                                          |                                     |      |         |      |                                        |           |        |
| Anxiety disorders <sup>c</sup>                                            | 945                                 | 23.5 | 66      | 32.9 | 1.60                                   | 1.11-2.30 | 0.013  |
| Personality disorders <sup>d</sup>                                        | 1,566                               | 38.4 | 118     | 53.4 | 1.83                                   | 1.27-2.63 | 0.001  |
| Non-alcohol drug dependence <sup>e</sup>                                  | 114                                 | 2.8  | 12      | 6.1  | 2.27                                   | 1.04-4.96 | 0.039  |
| Non-alcohol drug abuse <sup>f</sup>                                       | 438                                 | 11.3 | 36      | 18.3 | 1.76                                   | 1.09-2.84 | 0.022  |
| Nicotine dependence                                                       | 715                                 | 18.6 | 53      | 28.0 | 1.70                                   | 1.14-2.54 | 0.010  |
| Family history of alcoholism <sup>g</sup>                                 |                                     |      |         |      |                                        |           |        |
| Absent                                                                    | 2,176                               | 54.0 | 105     | 54.7 | 1.00                                   |           |        |
| Present                                                                   | 1,833                               | 46.0 | 103     | 45.3 | 0.97                                   | 0.69-1.37 | 0.866  |
| Lifetime treatment for mood symptoms <sup>h</sup>                         |                                     |      |         |      |                                        |           |        |
| No treatment                                                              | 1,723                               | 41.9 | 82      | 38.0 | 1.00                                   |           |        |
| Any treatment                                                             | 2,290                               | 58.1 | 126     | 62.0 | 1.17                                   | 0.82-1.68 | 0.378  |

**Footnotes for eTable 1A:**

**Note:** *At baseline, all participants reported drinking alcohol in the past year but none had a lifetime history of alcohol dependence.*

<sup>a</sup> Missing data for 8 participants.

<sup>b</sup> Diagnostic categories are not mutually exclusive.

<sup>c</sup> Includes 12-month generalized anxiety disorder, panic disorder and social anxiety disorder.

<sup>d</sup> Includes antisocial, narcissistic, histrionic, borderline, schizoid, schizotypal, paranoid, obsessive-compulsive, dependent and avoidant personality disorders.

<sup>e</sup> Includes lifetime history of dependence on heroin, other opioids, cocaine, cannabis, stimulants, hallucinogens.

<sup>f</sup> Includes lifetime history of abuse of heroin, other opioids, cocaine, cannabis, stimulants, hallucinogens.

<sup>g</sup> Missing data for 4 participants.

<sup>h</sup> Includes outpatient therapy, medication treatment and inpatient hospitalization.

**eTable 1B:** Characteristics of NESARC participants with threshold and sub-threshold mood syndromes at the wave 1 (baseline) interview in the study sample to assess *persistent* alcohol dependence (n=1547).

| Characteristics                                                           | Alcohol self-medication at baseline |      |         |      | Bivariate logistic regression analyses |           |        |
|---------------------------------------------------------------------------|-------------------------------------|------|---------|------|----------------------------------------|-----------|--------|
|                                                                           | Absent                              |      | Present |      | OR                                     | 95% CI    | p      |
|                                                                           | N                                   | %    | N       | %    |                                        |           |        |
| Sex                                                                       |                                     |      |         |      |                                        |           |        |
| Female                                                                    | 608                                 | 46.8 | 184     | 39.7 | 1.0                                    |           |        |
| Male                                                                      | 537                                 | 53.2 | 218     | 60.3 | 1.33                                   | 1.02-1.74 | 0.036  |
| Age (years)                                                               |                                     |      |         |      |                                        |           |        |
| 18-29                                                                     | 345                                 | 33.0 | 141     | 39.0 | 1.0                                    |           |        |
| 30-39                                                                     | 320                                 | 26.3 | 106     | 24.8 | 0.80                                   | 0.56-1.15 | 0.223  |
| 40-54                                                                     | 356                                 | 30.6 | 124     | 29.6 | 0.82                                   | 0.59-1.14 | 0.226  |
| 55+                                                                       | 124                                 | 10.1 | 31      | 6.5  | 0.55                                   | 0.32-0.93 | 0.026  |
| Race/ethnicity                                                            |                                     |      |         |      |                                        |           |        |
| Non-Hispanic white                                                        | 821                                 | 80.2 | 261     | 73.2 | 1.0                                    |           |        |
| Non-Hispanic black                                                        | 108                                 | 5.4  | 59      | 10.1 | 2.04                                   | 1.34-3.12 | 0.001  |
| Hispanic                                                                  | 168                                 | 9.4  | 56      | 9.2  | 1.07                                   | 0.68-1.71 | 0.758  |
| Other                                                                     | 48                                  | 5.0  | 26      | 7.4  | 1.62                                   | 0.88-3.00 | 0.122  |
| Education (years of schooling)                                            |                                     |      |         |      |                                        |           |        |
| <12                                                                       | 119                                 | 10.1 | 75      | 19.4 | 1.0                                    |           |        |
| 12 or GED                                                                 | 302                                 | 26.4 | 103     | 25.7 | 0.51                                   | 0.31-0.83 | 0.008  |
| >12                                                                       | 724                                 | 63.5 | 224     | 54.9 | 0.45                                   | 0.30-0.69 | <0.001 |
| Drinking pattern in the past year                                         |                                     |      |         |      |                                        |           |        |
| Less than every day                                                       | 987                                 | 87.0 | 267     | 67.2 | 1.0                                    |           |        |
| Every day or nearly every day                                             | 158                                 | 13.0 | 135     | 32.8 | 3.27                                   | 2.37-4.52 | <0.001 |
| Amount of alcohol consumed on drinking days in the past year <sup>a</sup> |                                     |      |         |      |                                        |           |        |
| Less than 5 drinks                                                        | 892                                 | 77.6 | 217     | 50.1 | 1.0                                    |           |        |
| 5 drinks or more                                                          | 251                                 | 22.4 | 183     | 49.9 | 3.44                                   | 2.62-4.52 | <0.001 |
| Affective diagnosis <sup>b</sup>                                          |                                     |      |         |      |                                        |           |        |
| Major depression                                                          | 342                                 | 27.9 | 247     | 64.2 | 4.63                                   | 3.42-6.26 | <0.001 |
| Mania/hypomania                                                           | 189                                 | 17.5 | 128     | 32.9 | 2.31                                   | 1.73-3.08 | <0.001 |
| Dysthymia                                                                 | 86                                  | 6.4  | 64      | 15.4 | 2.66                                   | 1.75-4.05 | <0.001 |
| Comorbid conditions <sup>b</sup>                                          |                                     |      |         |      |                                        |           |        |
| Anxiety disorders <sup>c</sup>                                            | 344                                 | 30.1 | 181     | 48.9 | 2.22                                   | 1.67-2.96 | <0.001 |
| Personality disorders <sup>d</sup>                                        | 629                                 | 54.2 | 301     | 73.6 | 2.35                                   | 1.71-3.24 | <0.001 |
| Non-alcohol drug dependence <sup>e</sup>                                  | 191                                 | 16.6 | 132     | 34.8 | 2.69                                   | 1.94-3.72 | <0.001 |
| Non-alcohol drug abuse <sup>f</sup>                                       | 396                                 | 34.6 | 186     | 49.4 | 1.85                                   | 1.40-2.44 | <0.001 |
| Nicotine dependence                                                       | 417                                 | 37.6 | 218     | 55.1 | 2.04                                   | 1.55-2.68 | <0.001 |
| Family history of alcoholism <sup>g</sup>                                 |                                     |      |         |      |                                        |           |        |
| Absent                                                                    | 440                                 | 40.8 | 146     | 35.0 |                                        |           |        |
| Present                                                                   | 703                                 | 59.2 | 254     | 65.0 | 1.28                                   | 0.95-1.7  | 0.098  |
| Lifetime treatment for mood symptoms <sup>h</sup>                         |                                     |      |         |      |                                        |           |        |
| No treatment                                                              | 545                                 | 49.8 | 158     | 37.8 |                                        |           |        |
| Any treatment                                                             | 600                                 | 50.2 | 244     | 62.2 | 1.64                                   | 1.24-.16  | 0.001  |

**Footnotes for eTable 1B:**

<sup>a</sup> Missing data for 4 participants.

<sup>b</sup> Diagnostic categories are not mutually exclusive.

<sup>c</sup> Includes 12-month generalized anxiety disorder, panic disorder and social anxiety disorder.

<sup>d</sup> Includes antisocial, narcissistic, histrionic, borderline, schizoid, schizotypal, paranoid, obsessive-compulsive, dependent and avoidant personality disorders.

<sup>e</sup> Includes lifetime history of dependence on heroin, other opioids, cocaine, cannabis, stimulants, hallucinogens.

<sup>f</sup> Includes lifetime history of abuse of heroin, other opioids, cocaine, cannabis, stimulants, hallucinogens.

<sup>g</sup> Missing data for 4 participants.

<sup>h</sup> Includes outpatient therapy, medication treatment and inpatient hospitalization.
